# Supplementary material for: Proteomics of Aqueous Humor as a Source of Disease Biomarkers in Retinoblastoma
Source: MDPI journal article supplement (doi:10.3390/ijms232113458), 2022-11-03
Supplement: s1 [file s1]

## Supplementary Files:

**Supplementary Table S1.** Name and function of the top ten proteins differentially expressed between the different groups, by comparing two groups at the time.

| <b>Fold-change<br/>naïve RB (Group 3)<br/>vs congenital cataract<br/>(Group 5) n= 241</b> | <b>Protein ID</b> | <b>Gene name</b> | <b>Protein name</b>                                                 | <b>Protein Function</b>                |
|-------------------------------------------------------------------------------------------|-------------------|------------------|---------------------------------------------------------------------|----------------------------------------|
| 5,35673                                                                                   | A0A2R8YGX3        | TPM4             | Tropomyosin alpha-4 chain                                           | Actin-binding,<br>Muscle protein       |
| 4,85457                                                                                   | P04080            | CSTB             | Cystatin-B                                                          | Protease Binding                       |
| 4,56122                                                                                   | P0C0L4            | C4A              | Complement C4-A                                                     | Endopeptidase inhibitor<br>activity    |
| 4,22218                                                                                   | Q16778            | HIST2H2BE        | Histone H2B type 2-E                                                | DNA Binding                            |
| 4,18093                                                                                   | P62805            | HIST1H4A         | Histone H4                                                          | DNA Binding                            |
| 4,16056                                                                                   | E9PB61            | ALYREF           | THO complex subunit 4                                               | Chaperone                              |
| 3,71647                                                                                   | H3BS70            | ECI1             | Enoyl-CoA delta isomerase 1                                         | Isomerase; Acid fat<br>metabolism      |
| 3,65666                                                                                   | J3QRJ3            | THY1             | Thy-1 antigen                                                       | Protein kinase binding                 |
| 3,46058                                                                                   | Q9UBP9-3          | GULP1            | PTB domain-containing engulfment<br>adapter protein 1               | Phagocytosis,<br>Engulfment            |
| 3,41917                                                                                   | Q12874            | SF3A3            | Splicing factor 3A subunit 3                                        | RNA binding                            |
| -4,30656                                                                                  | Q9UII2            | ATP5IF1          | ATPase inhibitor                                                    | Enzyme inhibitor activity              |
| -4,37824                                                                                  | Q13162            | PRDX4            | Peroxisredoxin-4                                                    | Thioredoxin peroxidase<br>activity     |
| -4,50416                                                                                  | Q9UHI8            | ADAMTS1          | A disintegrin and metalloproteinase<br>with thrombospondin motifs 1 | Metalloprotease                        |
| -4,64126                                                                                  | A0A2R8Y7M0        | TMF1             | TATA element modulatory factor                                      | DNA-binding                            |
| -4,75289                                                                                  | A0A075B6K2        | IGLV3-12         | Immunoglobulin lambda variable 3-<br>12                             | Antigen binding                        |
| -4,91635                                                                                  | Q7Z4T9-1          | MAATS1           | Cilia- and flagella-associated protein<br>91                        | Axonemal central<br>apparatus assembly |
| -5,04124                                                                                  | Q9C0D2            | CEP295           | Centrosomal protein of 295 kDa                                      | Microtubule binding                    |
| -5,59287                                                                                  | J3KSR8            | SRSF1            | Serine/arginine-rich-splicing factor 1                              | RNA-binding                            |
| -6,41151                                                                                  | P50991-2          | CCT4             | T-complex protein 1 subunit delta                                   | Protein folding chaperone              |
| -6,7774                                                                                   | A0A087WY08        | THSD7A           | Thrombospondin type-1 domain-<br>containing protein 7A              | Actin cytoskeleton<br>reorganization   |
| <b>Fold-change<br/>naïve RB (Group 3)<br/>vs inactive RB<br/>(Group 4) n=99</b>           |                   |                  |                                                                     |                                        |
| 4,16987                                                                                   | Q16778            | HIST2H2BE        | Histone H2B type 2-E                                                | DNA Binding                            |
| 3,91358                                                                                   | P62805            | HIST1H4A         | Histone H4                                                          | DNA Binding                            |
| 3,78363                                                                                   | K7EK07            | H3F3B            | Histone H3                                                          | DNA Binding                            |
| 2,94542                                                                                   | P14174            | MIF              | Macrophage migration inhibitory<br>factor                           | Protease binding                       |
| 2,93107                                                                                   | A0A0A0MS09        | IGHD             | Immunoglobulin heavy constant<br>delta                              | Antigen binding                        |

|                                                                                 |            |          |                                                    |                                                                               |
|---------------------------------------------------------------------------------|------------|----------|----------------------------------------------------|-------------------------------------------------------------------------------|
| 2,60369                                                                         | J3QRJ3     | THY1     | Thy-1 antigen                                      | Protein kinase binding                                                        |
| 2,58545                                                                         | G3V3A0     | SERPINA3 | Alpha-1-antichymotrypsin                           | Serine-type endopeptidase inhibitor activity                                  |
| 2,47378                                                                         | P01714     | IGLV3-19 | Immunoglobulin lambda variable 3-19                | Antigen binding                                                               |
| 2,47226                                                                         | G3V3U4     | PSMA6    | Proteasome subunit alpha type                      | Endopeptidase activity                                                        |
| 2,39743                                                                         | P04080     | CSTB     | Cystatin-B                                         | Protease Binding                                                              |
| -2,3841                                                                         | P24592     | IGFBP6   | IGF-binding protein 6                              | Insulin-like growth factor I binding                                          |
| -2,65906                                                                        | Q15573     | TAF1A    | TBP-associated factor 1A                           | DNA binding                                                                   |
| -2,72591                                                                        | P06331     | IGHV4-34 | Immunoglobulin heavy variable 4-34                 | Antigen binding                                                               |
| -2,85974                                                                        | Q5VU43-3   | PDE4DIP  | Myomegalin                                         | Enzyme binding                                                                |
| -2,86199                                                                        | Q9NPR2-2   | SEMA4B   | Semaphorin-4B                                      | Semaphorin receptor binding                                                   |
| -3,42494                                                                        | A0A2R8Y7M0 | TMF1     | TATA element modulatory factor                     | DNA-binding                                                                   |
| -3,80541                                                                        | P31944     | CASP14   | Caspase-14                                         | cysteine-type endopeptidase activity involved in execution phase of apoptosis |
| -4,06714                                                                        | A0A087WY08 | THSD7A   | THSD7A protein                                     | Actin cytoskeleton reorganization                                             |
| -4,54644                                                                        | A0A0A0MSL3 | UBE2V1   | Ubiquitin-conjugating enzyme E2 variant 1          | Regulation ubiquitination                                                     |
| -5,5349                                                                         | O60826     | CCDC22   | Coiled-coil domain-containing protein 22           | protein binding                                                               |
| <b>Fold-change inactive RB (Group 4) vs congenital cataract (Group 5) n=219</b> |            |          |                                                    |                                                                               |
| 4,55489                                                                         | Q9UBP9     | GULP1    | PTB domain-containing engulfment adapter protein 1 | Phagocytosis, Engulfment                                                      |
| 3,68028                                                                         | P16520     | GNB3     | Transducin beta chain 3                            | GTPase binding                                                                |
| 3,4783                                                                          | Q86V81     | ALYREF   | THO complex subunit 4                              | chaperone                                                                     |
| 3,12474                                                                         | P0C0L4     | C4A      | Complement C4-A                                    | endopeptidase inhibitor activity                                              |
| 2,89213                                                                         | Q14624     | ITIH4    | ITI heavy chain H4                                 | endopeptidase inhibitor activity                                              |
| 2,87557                                                                         | Q9BSC4     | NOL10    | Nucleolar protein 10                               | RNA binding                                                                   |
| 2,84919                                                                         | P00738     | HP       | Haptoglobin                                        | antioxidant activity                                                          |
| 2,76883                                                                         | Q9NQZ6     | ZC4H2    | Zinc finger C4H2 domain-containing protein         | metal ion binding                                                             |
| 2,66772                                                                         | P08185     | SERPINA6 | Corticosteroid-binding globulin                    | steroid binding                                                               |
| 2,62823                                                                         | P0DJI8     | SAA1     | Serum amyloid A-1 protein                          | heparin binding                                                               |
| -2,81749                                                                        | Q9UHI8     | ADAMTS1  | ADAM-TS 1                                          | Metalloprotease                                                               |
| -2,99939                                                                        | P84243     | H3F3B    | Histone H3.3                                       | DNA binding                                                                   |
| -3,11157                                                                        | P18206     | VCL      | Vinculin                                           | structural molecule activity                                                  |
| -3,22835                                                                        | Q9C0D2     | CEP295   | Centrosomal protein of 295 kDa                     | microtubule binding                                                           |
| -3,29948                                                                        | P30304     | CDC25A   | M-phase inducer phosphatase 1                      | protein kinase binding                                                        |
| -3,55858                                                                        | Q07955     | SRSF1    | Serine/arginine-rich splicing factor 1             | RNA-binding                                                                   |

|                                                                                                    |            |             |                                            |                                                                               |
|----------------------------------------------------------------------------------------------------|------------|-------------|--------------------------------------------|-------------------------------------------------------------------------------|
| -4,0664                                                                                            | Q8N3U4     | STAG2       | Cohesin subunit SA-2                       | chromatin binding                                                             |
| -4,31992                                                                                           | A0A075B6K2 | IGLV3-12    | Immunoglobulin lambda variable 3-12        | antigen binding                                                               |
| -5,1572                                                                                            | P50991     | CCT4        | T-complex protein 1 subunit delta          | protein folding chaperone                                                     |
| -6,13756                                                                                           | Q7Z4T9     | MAATS1      | Cilia- and flagella-associated protein 91  | axonemal central apparatus assembly                                           |
| <b>Fold-change<br/>active vitreous<br/>seeding (Group1) vs<br/>inactive RB (Group<br/>4) n= 86</b> |            |             |                                            |                                                                               |
| 4,69686                                                                                            | Q8NI35-5   | INADL/ PATJ | InaD-like protein                          | tight junction assembly                                                       |
| 3,41233                                                                                            | E5RGQ7     | DMTN        | Dematin                                    | actin binding                                                                 |
| 3,27358                                                                                            | Q16778     | HIST2H2BE   | Histone H2B type 2-E                       | DNA Binding                                                                   |
| 3,20713                                                                                            | E7EMB1     | SWAP70      | Switch-associated protein 70               | DNA binding                                                                   |
| 2,84011                                                                                            | P49454     | CENPF       | Centromere protein F                       | microtubule binding                                                           |
| 2,74007                                                                                            | E9PGC8     | MAP1A       | Microtubule-associated protein 1A          | microtubule binding                                                           |
| 2,32901                                                                                            | E7END6     | PROC        | Vitamin K-dependent protein C              | calcium ion binding                                                           |
| 2,30372                                                                                            | X6R3R3     | SOGA1       | Protein SOGA1                              | negative regulation of gluconeogenesis                                        |
| 2,20224                                                                                            | Q8NEG4     | FAM83F      | Protein FAM83F                             | protein kinase binding                                                        |
| 2,18047                                                                                            | A0A5H1ZRQ7 | IGLC7       | Immunoglobulin lambda constant 7           | antigen binding                                                               |
| -2,55872                                                                                           | Q8WYP5     | AHCTF1      | Protein ELYS                               | DNA binding                                                                   |
| -2,66037                                                                                           | Q8TE73     | DNAH5       | Dynein axonemal heavy chain 5              | ATP binding                                                                   |
| -2,68194                                                                                           | P45973     | CBX5        | Chromobox protein homolog 5                | Protein binding                                                               |
| -2,84219                                                                                           | Q9NQZ6-2   | ZC4H2       | Zinc finger C4H2 domain-containing protein | metal ion binding                                                             |
| -2,85539                                                                                           | P10451-5   | SPP1        | Osteopontin                                | extracellular matrix binding                                                  |
| -3,04056                                                                                           | A0A087WVF7 | ITSN2       | Intersectin-2                              | calcium ion binding                                                           |
| -3,23823                                                                                           | Q5HYK7-3   | SH3D19      | SH3 domain-containing protein 19           | cytoskeleton organization                                                     |
| -3,25443                                                                                           | P20851     | C4BPB       | C4b-binding protein beta chain             | regulation of opsonization                                                    |
| -3,63481                                                                                           | Q9C0D2     | CEP295      | Centrosomal protein of 295 kDa             | microtubule binding                                                           |
| -4,74572                                                                                           | A0A0A0MSL3 | UBE2V1      | Ubiquitin-conjugating enzyme E2 variant 1  | Regulation ubiquitination                                                     |
| <b>Fold-change<br/>active aqueous<br/>seeding (Group 2) Vs<br/>naïve RB (Group 3)<br/>n=131</b>    |            |             |                                            |                                                                               |
| 7,33912                                                                                            | P02787     | TF          | Serotransferrin                            | transferrin receptor binding                                                  |
| 7,00994                                                                                            | Q8NI35-5   | INADL       | InaD-like protein                          | tight junction assembly                                                       |
| 5,65275                                                                                            | P31944     | CASP14      | Caspase-14                                 | cysteine-type endopeptidase activity involved in execution phase of apoptosis |
| 4,61768                                                                                            | Q9HCQ7-2   | NPVF        | Neuropeptide RFRP-3                        | signaling receptor binding                                                    |
| 3,94207                                                                                            | H7C5C6     | STIM2       | Stromal interaction molecule 2             | calcium ion binding                                                           |
| 3,67324                                                                                            | Q8NFU5     | IPMK        | Inositol polyphosphate multikinase         | transferase                                                                   |
| 3,63418                                                                                            | Q9Y383     | LUC7L2      | Putative RNA-binding protein Luc7-like 2   | RNA binding                                                                   |
| 3,48703                                                                                            | Q5VU43-3   | PDE4DIP     | Myomegalin                                 | enzyme binding                                                                |

|          |            |          |                                                |                                              |
|----------|------------|----------|------------------------------------------------|----------------------------------------------|
| 3,44613  | Q8IWA6     | CCDC60   | Coiled-coil domain-containing protein 60       | Microtubule-binding protein                  |
| 3,40074  | F2Z2G5     | WFDC3    | WAP four-disulfide core domain protein 3       | serine-type endopeptidase inhibitor activity |
| -3,06905 | Q5HYK7-3   | SH3D19   | SH3 domain-containing protein 19               | cytoskeleton organization                    |
| -3,11417 | A0A075B6H9 | IGLV4-69 | Immunoglobulin lambda variable 4-69            | antigen binding                              |
| -3,3074  | G3V3A0     | SERPINA3 | Alpha-1-antichymotrypsin                       | serine-type endopeptidase inhibitor activity |
| -3,40435 | P02766     | TTR      | Transthyretin                                  | protein-containing complex binding           |
| -3,46545 | A0A075B6I9 | IGLV7-46 | Immunoglobulin lambda variable 7-46            | antigen binding                              |
| -3,57237 | A0A0A0MSS5 | SMARCA2  | Probable global transcription activator SNF2L2 | DNA-binding                                  |
| -3,82615 | P48507-2   | GCLM     | Glutamate--cysteine ligase regulatory subunit  | protein-containing complex bindin            |
| -4,039   | A0A0C4DGD1 | CAST     | Calpain inhibitor                              | endopeptidase inhibitor activity             |
| -4,70627 | Q5KU26     | COLEC12  | Collectin-12                                   | metal ion binding                            |
| -4,85584 | E9PB61     | ALYREF   | THO complex subunit 4                          | chaperone                                    |

**Supplementary Table S2.** Lyst of 96 genes coding proteins represented in the network with overall association score.

| Symbol   | Overall Association Score | Name                                     |
|----------|---------------------------|------------------------------------------|
| TUBB3    | 0,413198                  | Tubulin beta 3 class III                 |
| TUBB4B   | 0,406135                  | Tubulin beta 4B class IVb                |
| TUBB     | 0,406135                  | Tubulin beta class I                     |
| AKT1     | 0,086406                  | AKT serine/threonine kinase 1            |
| PPIA     | 0,073916                  | Peptidylprolyl isomerase A               |
| LRG1     | 0,057285                  | Leucine rich alpha-2-glycoprotein 1      |
| MMP2     | 0,040225                  | Matrix metalloproteinase 2               |
| PRDX1    | 0,035627                  | Peroxisiredoxin 1                        |
| TP53BP2  | 0,033624                  | Tumor protein p53 binding protein 2      |
| ESD      | 0,032303                  | Esterase D                               |
| SERPINF1 | 0,032091                  | Serpin family F member 1                 |
| WIF1     | 0,031703                  | WNT inhibitory factor 1                  |
| S100A4   | 0,030771                  | S100 calcium binding protein A4          |
| ENO2     | 0,029371                  | Enolase 2                                |
| ENO1     | 0,028694                  | Enolase 1                                |
| APEX1    | 0,028458                  | Apyrimidinic endodeoxyribonuclease 1     |
| NME1     | 0,027349                  | NME/NM23 nucleoside diphosphate kinase 1 |
| RBP3     | 0,025557                  | Retinol binding protein 3                |
| ILF3     | 0,025131                  | Interleukin enhancer binding factor 3    |
| CDH2     | 0,020569                  | Cadherin 2                               |
| TGFBI    | 0,01774                   | Transforming growth factor beta induced  |
| TKT      | 0,017029                  | Transketolase                            |
| ECM1     | 0,017001                  | Extracellular matrix protein 1           |

|         |          |                                                      |
|---------|----------|------------------------------------------------------|
| STMN1   | 0,0165   | Stathmin 1                                           |
| SMARCA2 | 0,016303 | SWI/SNF relatedmember 2                              |
| GAPDH   | 0,015769 | Glyceraldehyde-3-phosphate dehydrogenase             |
| HNRNPK  | 0,015317 | Heterogeneous nuclear ribonucleoprotein K            |
| HMGB1   | 0,014793 | High mobility group box 1                            |
| PTPRC   | 0,014414 | Protein tyrosine phosphatase receptor type C         |
| NCAM1   | 0,014044 | Neural cell adhesion molecule 1                      |
| MCM7    | 0,014044 | Minichromosome maintenance complex component 7       |
| ACTB    | 0,013654 | Actin beta                                           |
| APOD    | 0,013305 | Apolipoprotein D                                     |
| RELN    | 0,012935 | Reelin                                               |
| CLU     | 0,012935 | Clusterin                                            |
| LAMB2   | 0,012165 | Laminin subunit beta 2                               |
| CDC25A  | 0,01121  | Cell division cycle 25°                              |
| TUBA1B  | 0,011087 | Tubulin alpha 1b                                     |
| RCVRN   | 0,010595 | Recoverin                                            |
| CD44    | 0,010502 | CD44 molecule                                        |
| SFRP2   | 0,009424 | Secreted frizzled related protein 2                  |
| VIM     | 0,009138 | Vimentin                                             |
| TMPO    | 0,00887  | Thymopoietin                                         |
| EGFLAM  | 0,00887  | EGF like, fibronectin type III and laminin G domains |
| IGFBP5  | 0,00887  | Insulin like growth factor binding protein 5         |
| AHSG    | 0,008131 | Alpha 2-HS glycoprotein                              |
| CRYAB   | 0,007946 | Crystallin alpha B                                   |
| LDHA    | 0,007925 | Lactate dehydrogenase A                              |
| IGFBP2  | 0,007761 | Insulin like growth factor binding protein 2         |
| COL18A1 | 0,007392 | Collagen type XVIII alpha 1 chain                    |
| NR1I2   | 0,007392 | Nuclear receptor subfamily 1 group I member 2        |
| FEN1    | 0,007392 | Flap structure-specific endonuclease 1               |
| TGFB2   | 0,007392 | Transforming growth factor beta 2                    |
| CLUL1   | 0,007392 | Clusterin like 1                                     |
| MYH9    | 0,007022 | Myosin heavy chain 9                                 |
| SOD1    | 0,005913 | Superoxide dismutase 1                               |
| ANXA5   | 0,005391 | Annexin A5                                           |
| IGFBP3  | 0,004805 | Insulin like growth factor binding protein 3         |
| LOX     | 0,004435 | Lysyl oxidase                                        |
| FN1     | 0,004322 | Fibronectin 1                                        |
| HSPA4   | 0,00425  | Heat shock protein family A (Hsp70) member 4         |
| HMGB2   | 0,004065 | High mobility group box 2                            |
| LMNB1   | 0,004065 | Lamin B1                                             |
| UCHL1   | 0,003696 | Ubiquitin C-terminal hydrolase L1                    |
| CENPE   | 0,003696 | Centromere protein E                                 |
| SLC2A1  | 0,003696 | Solute carrier family 2 member 1                     |
| RAD50   | 0,003696 | RAD50 double strand break repair protein             |
| CHGA    | 0,003696 | Chromogranin A                                       |
| NCL     | 0,003696 | Nucleolin                                            |
| RS1     | 0,003696 | Retinoschisin 1                                      |
| MCM6    | 0,002957 | Minichromosome maintenance complex component 6       |
| C3      | 0,002217 | Complement C3                                        |
| MYOC    | 0,002217 | Myocilin                                             |

|          |          |                                                   |
|----------|----------|---------------------------------------------------|
| CANX     | 0,002217 | Calnexin                                          |
| SPP1     | 0,002217 | Secreted phosphoprotein 1                         |
| PPA1     | 0,002217 | Inorganic pyrophosphatase 1                       |
| APOE     | 0,002217 | Apolipoprotein E                                  |
| APOA1    | 0,002217 | Apolipoprotein A1                                 |
| TIMP1    | 0,002217 | TIMP metalloproteinase inhibitor 1                |
| PON1     | 0,002217 | Paraoxonase 1                                     |
| AGT      | 0,002217 | Angiotensinogen                                   |
| PRTN3    | 0,001478 | Proteinase 3                                      |
| KMT2C    | 0,001478 | Lysine methyltransferase 2C                       |
| CFH      | 0,001478 | Complement factor H                               |
| RBBP4    | 0,001478 | RB binding protein 4, chromatin remodeling factor |
| SERPINA3 | 0,001478 | Serpin family A member 3                          |
| GBE1     | 0,001478 | 1,4-alpha-glucan branching enzyme 1               |
| DCD      | 0,001478 | Dermcidin                                         |
| HTRA1    | 0,001478 | HtrA serine peptidase 1                           |
| APP      | 0,001478 | Amyloid beta precursor protein                    |
| MCM3     | 0,001478 | Minichromosome maintenance complex component 3    |
| MAPK1    | 0,001478 | Mitogen-activated protein kinase 1                |
| KHSRP    | 0,001478 | KH-type splicing regulatory protein               |
| CYCS     | 0,001478 | Cytochrome c, somatic                             |
| ALYREF   | 0,001478 | Aly/REF export factor                             |
| VGF      | 0,001478 | VGF nerve growth factor inducible                 |

#### Supplementary Figure S1:

The expression of the 5 most significantly upregulated proteins in the AH samples with RB when compared to the control group (namely PATJ in Group 1 and 2, Histone H2B type 2-E in Group 3 and Ube2V1 in Group 4, GAPDH and CD44 in all RB disease group) was analyzed for clinical validation and confirmed by a Western blot analysis performed in RB primary cell lines derived from retinal and vitreous tumor (Figure 4).

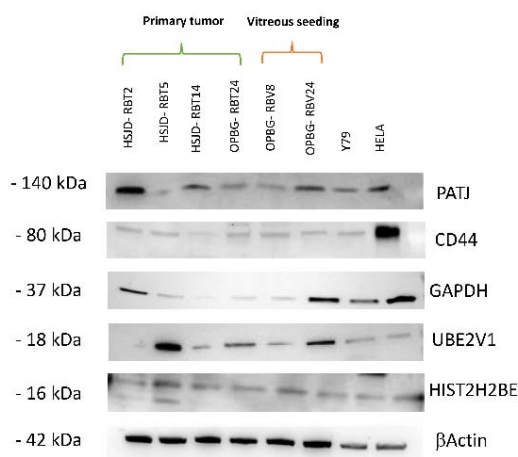

Western blot analysis of 5 selected proteins: PatJ; CD44; GAPDH; UNE2V1 and HIST2H2BE in 4 RBT and 2 RBVS representative RB cell lines. β-Actin was reported as loading control.

**Supplementary Table S3.** Patients' demographics, previous given treatments and clinical features at time of the aqueous humor (AH) sampling.

| Patient/<br>Study<br>Group | Series<br>Sample<br>s | Age at<br>AH<br>sampling<br>(months) | Gender | Lateralit<br>y | Studied<br>Eye | Classificati<br>on<br>Group<br>(IIRC) | Previous<br>treatments                                                                                 | Tumor status at time<br>of AH collection | Study<br>Group                                                                                                                                     |
|----------------------------|-----------------------|--------------------------------------|--------|----------------|----------------|---------------------------------------|--------------------------------------------------------------------------------------------------------|------------------------------------------|----------------------------------------------------------------------------------------------------------------------------------------------------|
| 1/1                        | S001                  | 36                                   | F      | U              | OS             | D                                     | IVC (2x),<br>Thermo-CT (1x)<br>IAC (3x)<br>FT                                                          | Active VS *                              | <b>GROUP 1</b><br><b>Isolated active</b><br><b>vitreous</b><br><b>seeding</b>                                                                      |
| 2/1                        | S002                  | 71                                   | M      | U              | OD             | D                                     | IVC (6x),<br>IAC M (6x),<br>IAC MT (3x),<br>FT                                                         | Active VS *                              |                                                                                                                                                    |
| 3/1                        | S003                  | 30                                   | M      | B              | OD             | D                                     | IVC (2x),<br>IAC M (1x),<br>IAC MT (2x),<br>Ivit M (3x),<br>FT                                         | Active VS *                              |                                                                                                                                                    |
| 4/1                        | S004                  | 33                                   | M      | B              | OD             | D                                     | IVT (2x),<br>IAC M (3x),<br>IAC MT (2x),<br>Ivit T (1x),<br>FT                                         | Active VS *                              |                                                                                                                                                    |
| 5/1                        | S005                  | 77                                   | F      | U              | OD             | D                                     | IAC M (2x),<br>FT                                                                                      | Active VS *                              |                                                                                                                                                    |
| 6/2                        | S006                  | 255                                  | M      | B              | OS             | na                                    | IVC (13x),<br>FT,<br>plaque (1x),<br>IAC M(6x),<br>Ivit M (x,<br>elsewhere)                            | Active AS §                              | <b>GROUP 2</b><br><b>Active</b><br><b>aqueous</b><br><b>humor</b><br><b>seeding ±</b><br><b>other</b><br><b>intraocular</b><br><b>active sites</b> |
| 6/2                        | S007                  | 255                                  | M      | B              | OS             | na                                    | IVC (13x),<br>FT,<br>plaque (1x),<br>IAC M(6x),<br>Ivit M (x<br>elsewhere),<br>ICC (1x),<br>IvitM (1x) | Active AS §                              |                                                                                                                                                    |
| 6/2                        | S008                  | 256                                  | M      | B              | OS             | na                                    | IVC (13x),<br>FT,<br>plaque (1x),<br>IAC M(6x),<br>Ivit M (x<br>elsewhere),<br>ICC (4x),<br>IvitM (3x) | Active AS §                              |                                                                                                                                                    |
| 6/2                        | S009                  | 256                                  | M      | B              | OS             | na                                    | IVC (13x),<br>FT,                                                                                      | Active AS §                              |                                                                                                                                                    |

|      |      |     |   |   |    |    |                                                                                                          |                  |
|------|------|-----|---|---|----|----|----------------------------------------------------------------------------------------------------------|------------------|
|      |      |     |   |   |    |    | plaque (1x),<br>IAC M(6x),<br>Ivit M (x<br>elsewhere),<br>ICC(5x),<br>Ivit M(4x)                         |                  |
| 6/2  | S010 | 256 | M | B | OS | na | IVC (13x),<br>FT,<br>plaque (1x),<br>IAC M(6x),<br>Ivit M (x<br>elsewhere),<br>ICC (6x),<br>Ivit M(5x)   | Active AS §      |
| 6/2  | S011 | 256 | M | B | OS | na | IVC (13x),<br>FT,<br>plaque (1x),<br>IAC M(6x),<br>Ivit M (x<br>elsewhere),<br>ICC (7x),<br>Ivit M(5x)   | Active AS §      |
| 6/2  | S012 | 257 | M | B | OS | na | IVC (13x),<br>FT,<br>plaque (1x),<br>IAC M(6x),<br>Ivit M (x<br>elsewhere),<br>ICC M (9x)<br>Ivit M (7x) | Active AS §      |
| 7/2  | S013 | 113 | M | U | OS | D  | -                                                                                                        | Active AS §      |
| 7/2  | S014 | 113 | M | U | OS | D  | Ivit T (1x),<br>ICC T (1x),<br>IAC M(1x)                                                                 | Active AS §      |
| 8/3  | S015 | 3   | F | U | OS | E  | -                                                                                                        | Active RT + SRS  |
| 9/3  | S016 | 28  | F | U | OS | E  | -                                                                                                        | Active RT + VS ° |
| 10/3 | S017 | 20  | F | U | OD | E  | -                                                                                                        | Active RT °      |
| 11/3 | S018 | 47  | M | U | OS | E  | -                                                                                                        | Active RT + VS ° |
| 12/3 | S019 | 624 | F | U | OS | E  | -                                                                                                        | Active RT + VS ° |
| 13/3 | S020 | 61  | M | U | OD | E  | -                                                                                                        | Active RT + VS ° |
| 14/4 | S021 | 16  | M | B | OD | na | IVC (4x),<br>FT,<br>IAC M (3x),<br>IvitC M (3x)                                                          | Inactive §       |
| 15/4 | S022 | 17  | M | U | OD | E  | IVC (3x),<br>FT,<br>Ivit M (2x)                                                                          | Inactive §       |
| 16/4 | S023 | 10  | F | B | OD | C  | IVC (3x),<br>FT,<br>IvitC M (2x)                                                                         | Inactive §       |
| 17/4 | S024 | 36  | F | U | OS | D  | IAC M (3x),<br>IvitC M (5x)                                                                              | Inactive §       |

**GROUP 3  
naïve RB**

**GROUP 4:  
inactive RB**



|      |      |     |   |   |    |    |                                                                                                   |             |
|------|------|-----|---|---|----|----|---------------------------------------------------------------------------------------------------|-------------|
| 18/4 | S025 | 61  | M | U | OS | D  | IVC (2x),<br>ICC (6x),<br>IvitC M (7x)                                                            | Inactive §  |
| 19/4 | S026 | 101 | F | B | OD | D  | IVC (2x),<br>EBR (2x),<br>IvitC M (9x),<br>Plaque (1x),<br>FT                                     | Inactive §  |
| 20/4 | S027 | 56  | M | U | OS | na | IAC MT (8x),<br>Thermo-CT<br>(2x),<br>Ivit (6x),<br>FT,<br>Plaque (1x),<br>Ivit anti-VEGF<br>(1x) | Inactive §  |
| 21/4 | S028 | 42  | F | U | OS | D  | IVC (1x),<br>IAC M (3x),<br>FT,<br>IvitC M (4x)                                                   | Inactive §  |
| 21/4 | S029 | 49  | F | U | OS | D  | IVC (1x),<br>IAC M (3x),<br>FT,<br>Plaque (1x),<br>IvitC M (6x)                                   | Inactive §  |
| 22/4 | S030 | 50  | M | U | OS | D  | IVC (na),<br>IAC M (3x),<br>FT,<br>IvitC M (1x)                                                   | Inactive §  |
| 23/4 | S031 | 36  | F | U | OS | D  | IVC (2x),<br>Thermo-CT (1),<br>FT,<br>IAC M (3x),<br>IvitC M (3x)                                 | Inactive §  |
| 24/4 | S032 | 38  | M | U | OS | D  | IAC M (3x),<br>IvitC M (6x)                                                                       | Inactive §  |
| 25/4 | S033 | 49  | M | B | OD | D  | IVC (2x),<br>Thermo CT<br>(2x),<br>FT,<br>IvitC M (10x),                                          | Inactive §§ |
| 26/4 | S034 | 95  | M | U | OS | na | IAC M (3x),<br>IvitC M(6x)                                                                        | Inactive §§ |
| 27/4 | S035 | 75  | F | U | OD | na | IVC (4x),<br>EBR (1x),<br>IvitC M (6x)                                                            | Inactive §§ |
| 28/4 | S036 | 16  | M | B | OS | B  | IVC (6x),<br>FT,<br>IAC M (1x),<br>IvitC M (1x)                                                   | Inactive §  |
| 29/4 | S037 | 35  | M | U | OS | D  | IVC (2x),<br>IAC M (3x),                                                                          | Inactive §  |

|      |      |    |   |   |    |   |                                                                                                     |                                            |
|------|------|----|---|---|----|---|-----------------------------------------------------------------------------------------------------|--------------------------------------------|
|      |      |    |   |   |    |   | FT,<br>IvitC M (1x)                                                                                 |                                            |
| 30/4 | S038 | 61 | F | U | OD | E | IAC M (3x),<br>FT,<br>Ivit M (6x)                                                                   | Inactive §                                 |
| 31/4 | S039 | 7  | F | B | OS | B | IVC (2x),<br>FT,<br>IvitC M (2x)                                                                    | Inactive §                                 |
| 32/4 | S040 | 31 | F | U | OD | D | IVC (4x),<br>IvitC M (5x),<br>FT,<br>IAC M (2x)                                                     | Inactive §                                 |
| 33/4 | S041 | 24 | M | U | OS | D | IVC (1x),<br>IAC M (3x),<br>Ivit M (3x)                                                             | Inactive §                                 |
| 34/4 | S042 | 37 | F | B | OS | D | IAC M (3x),<br>FT, IvitC M (3x)                                                                     | Inactive §                                 |
| 35/4 | S043 | 38 | M | U | OS | C | IVC (1x),<br>IAC M (1x),<br>IAC M+T (1x),<br>IvitC M (4x),<br>FT, plaque (1x)                       | Inactive §                                 |
| 36/4 | S044 | 41 | F | U | OS | D | IVC (1x),<br>IAC M (2x),<br>IvitC M (1x)                                                            | Inactive §                                 |
| 37/4 | S045 | 12 | M | B | OD | D | IVC (2x),<br>FT,<br>IvitC M (2x)                                                                    | Inactive §                                 |
| 38/4 | S046 | 30 | M | B | OS | D | IVC (2x),<br>Thermo CT<br>(1x),<br>FT, IAC M (3x),<br>IVC M+T (2x),<br>IvitC M (4x),<br>plaque (1x) | Inactive §                                 |
| 39/4 | S047 | 20 | M | U | OS | D | IAC M (3x),<br>IvitC M (2x)                                                                         | Inactive §                                 |
| 40/5 | S048 | na | M | B | OS |   | -                                                                                                   | <b>GROUP 5<br/>congenital<br/>cataract</b> |
| 41/5 | S049 | na | M | B | OS |   | -                                                                                                   |                                            |
| 42/5 | S050 | 65 | M | B | OD |   | -                                                                                                   |                                            |
| 43/5 | S051 | na | F | B | OS |   | -                                                                                                   |                                            |
| 42/5 | S052 | 65 | M | B | OS |   | -                                                                                                   |                                            |
| 44/5 | S053 | 99 | M | U | OS |   | -                                                                                                   |                                            |

Legends: M = male; F = female; U = unilateral; B = bilateral; IIRC = International Intraocular Retinoblastoma Classification (Linn Murphree, 2005); OS = oculus sinister; OD = oculus dexter; na = not available; IVC = intravenous chemotherapy; Thermo-CT = Thermochemotherapy; FT: focal laser treatment; IAC = intraarterial chemotherapy; IvitC = intravitreal chemotherapy; ICC = intracameral chemotherapy; M = melphalan; T = topotecan; EBR = external beam radiotherapy; VS = vitreous seeding; AS = aqueous seeding; SRS = subretinal seeding; \* = AH sample obtained at time of the first IvitC given for an isolated vitreous disease relapse; § = confirmed on cytopathology; ° = AH sample obtained after primary enucleation; § = AH sampling obtained at time of a consolidation IvitC injection, with no other intraocular active site; §§ = obtained at time of cataract surgery with no intraocular active site

## Supplementary Materials and methods:

### *Cells and Cell Culture:*

Human RB cell lines HSJD-RBT-2, HSJD-RBT-5, HSJD-RBT-14 were established from enucleated eyes of RB patients at Hospital Sant Joan de Deu (HSJD, Barcelona, Spain). Specimens were collected from two possible sources: solid tumor tissue in the retina (RB tumor; RBT) [Pascual-Pasto, G. *et al.* Preclinical platform of retinoblastoma xenografts recapitulating human disease and molecular markers of dissemination. *Cancer Lett.* **2016**, 1, 10-19. doi: 10.1016/j.canlet.2016.06.012]. Human RB cell lines OPBG-RBVS8 and OPBG-RBT24 and OPBG-RBVS 24 were obtained from enucleated eyes of RB Patients at Bambino Gesù Children Hospital. Cells were cultured as floating tumor-spheres in neural stem cell medium (serum-free), consisting of Neurobasal-A Medium (1×, ThermoFisher, Waltham, MA, USA), plus DMEM/F-12 (1×, ThermoFisher, Waltham, MA, USA) supplemented with HEPES Buffer Solution (1M, ThermoFisher, Waltham, MA, USA), Sodium pyruvate mem 100 mM (CE, ThermoFisher, Waltham, MA, USA), MEM Non-essential Amino Acids Solution 10 mM (100×, ThermoFisher, Waltham, MA, USA), GlutaMAX-I Supplement (100×, ThermoFisher, Waltham, MA, USA), Antibiotic-Antimycotic (100×, ThermoFisher, Waltham, MA, USA) B27 Supplement Minus Vitamin-A (50×, ThermoFisher, Waltham, MA, USA), Recombinant Human-basic FGF (20 ng/mL, Peprotech, Cranbury, NJ, USA), Recombinat Human EGF (20 ng/mL, Peprotech, Cranbury, NJ, USA), Human PDGF-AA (20ng/mL, Peprotech, Cranbury, NJ, USA), Human PDGF-BB (10 ng/mL, Peprotech, Cranbury, NJ, USA) and Heparin Solution 0.2% (2 µg/mL, Sigma Aldrich, St. Louis, MO, USA), as previously described [Monje, M. *et al.* Hedgehog-responsive candidate cell of origin for diffuse intrinsic pontine glioma. *Proc Natl Acad Sci U S A.* **2011**, 11, 4453-4458. doi: 10.1073/pnas.1101657108]. Cell lines were maintained at 37 °C in a 5% (v/v) CO<sub>2</sub> humidified incubator.

### *Western Blot:*

Cell lysis buffer (Cell Lysis Buffer (10×) #9803 Cell Signalling Technology, Danvers, MA, USA), supplemented with 10 mM phenylmethylsulphonylfluoride (PMSF 93,482 Sigma, St. Louis, MO, USA), as a protease inhibitor was used to extract the proteins from cells. Briefly, lysates were incubated on ice for 15 min and centrifugated at 13,000× g for 20 min at 4 °C. Equal micrograms of proteins, quantified with BCA assay (Pierce, Thermo Scientific, Waltham, MA, USA) and boiled in SDS-loading buffer (2× Laemmli Sample Buffer BIORAD cat.#161-0737), were resolved on 10% SDS-PAGE and transferred to PVDF membranes (Immun-Blot® PVDF Membrane for protein Blotting BIORAD cat.#162-0177). Blots were blocked for 1 h in TBS-T (TBS plus 0.05% Tween-20), 5% nonfat, dried milk and probed overnight at 4 °C with anti-GAPDH (D16H11) XP (Cell Signaling Technology®, Danvers, MA, USA), anti-UBE2V1(HPA052535) (ATLAS ANTIBODIES), Anti-PATJ (PA5-76397) (ThermoFisher Scientific, Waltham, MA, USA), Anti-Histone H2B type 2-E (H2be) (ABE1384) (Merck, Millipore), CD44 (156-33C11) (Cell Signalling Technology) or β-Actin (C4) (sc-47778) (Santa Cruz Biotechnology, Dallas, TX, USA). Immunocomplexes were detected with horseradish peroxidase-conjugated species-specific secondary antibodies (Santa Cruz Biotechnology, Dallas, TX, USA), followed by enhanced chemiluminescence reaction with Immobilon Western Chemiluminescence HRP substrate WBKLS0100 (Millipore, Burlington, MA, USA).
